# Supplementary material for: An electrochemiluminescence sensor for adrenaline assay based on the tyrosinase/SiC/chitosan modified electrode
Source: Royal Society of Chemistry journal article supplement (doi:10.1039/c3cc43818j), 2013-01-01
Supplement: c3cc43818j.pdf [file c3cc43818j.pdf]

## Supporting Information

### 1. Experimental

#### 1.1 Chemicals

All the reagents were of analytical grade or better. Tyrosinase, lucigenin (N,N'-dimethyl-9',9'-biacridinium dinitrate) and 5% Nafion were purchased from sigma company. Chitosan (CS, M.W.  $1.68 \times 10^5$ , 91.7% after deacetylation), 30% (v/v) H<sub>2</sub>O<sub>2</sub> and hydrochloric acid adrenal injection were purchased from commercial sources and used as received. SiC nanoparticles with an average particle size of 15 nm, supplied by MTI Corporation, USA were used in this work.

#### 1.2 Preparation of the Tyr/CS/SiC modified electrode

Figure 1 shows the schematic of the fabrication process for the electrochemiluminescent composite sensor and its principle for adrenaline assay. Firstly, the SiC powder was dissolved in 0.5 wt% CS solution, and sonicated to mix homogeneously. And then the GCE was polished with 0.05 μm alumina slurry and sonicated in ethanol and deionized water for 5 min each, and immersed in the previous SiC solution, deposited on the GCE surface via potentiostatic electrochemical polymerization at -2.0 V. The CS/SiC modified electrode was successively rinsed with deionized water, ethanol for several times, and dried at room temperature. Tyrosinase was modified on the electrode surface via the electrostatic interaction. Firstly, the tyrosinase was dissolved in PBS solution (pH 7.0), and 0.1% Nafion was added into the above solution. Next, 3.0 μL of the mixture was dropped onto the surface of the CS/SiC modified electrode. After drying 1.0 h at room temperature, the Tyr/CS/SiC modified electrode was obtained.

#### 1.3 ECL assay

26 Above Tyr/CS/SiC modified electrode was immersed into the solution  
27 containing different concentrations of adrenaline for 20 min, and then rinsed using  
28 distilled water for ECL assay. A control experiment was also performed. CS/SiC  
29 modified electrode was immersed into the solution containing 1 mg/mL Tyr and  
30  $5 \times 10^{-6}$  mol/L adrenaline.

#### 31 **1.4 ECL assay.**

32 The ECL detection system contains a BPCL-Weak Luminescence Analyzer  
33 (Institute of Biophysics, Chinese Academy of Science, Beijing, China), a CHI 620  
34 electrochemical system (CH Instruments, USA) and an ECL cell. 2 mL solution  
35 containing  $1.0 \times 10^{-5}$  mol/L lucigenin,  $1 \times 10^{-8}$  mol/L  $H_2O_2$ , and 0.01 mol/L KCl was  
36 transferred to the ECL cell. A conventional three-electrode system was used as the  
37 electrolytic system, which composed a glass carbon electrode (GCE) as the working  
38 electrode, platinum wire as the counter electrode and an Ag/AgCl (sat. KCl) electrode  
39 as the reference electrode.

#### 40 **2. Analysis of real samples**

41 In this study, the proposed method is applied to detect adrenaline in hydrochloric  
42 acid adrenal injection (1.0 mg/mL) and clinical serum samples. To the hydrochloric  
43 acid adrenal injection, 3 samples with different concentrations is prepared before  
44 determination. Each sample is tested for five times under the optimum condition. And  
45 the recoveries are examined by the standard addition method to verify the accuracy of  
46 the proposed method. The results are listed in Table S2 (see Supporting Information),  
47 and the recoveries are in the range of 85.8~106.2%. To clinical serum samples, it is  
48 found that there is no ECL response based on this modified electrode. The reason may  
49 be the adrenal concentration of the plasma samples is not in the range of linear  
50 response of this modified electrode. Next, adrenal standard solutions were added into

51 the solution, and then the ECL signals were recorded, shown in Table S3. The  
52 recoveries are in the range of 91.0~115.9%. These results demonstrate that the  
53 proposed method can be applied to detect adrenaline in real samples successfully.

54

55

56

57

58

59

60

61

62

63

64

65

66

67

68

69

70

71

72

73

74

75

76

77 **Figure**

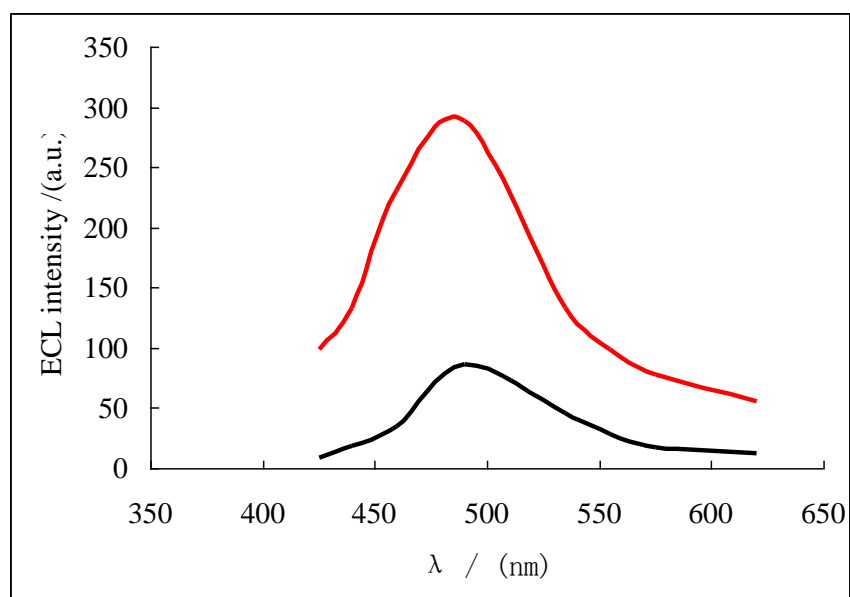

78

79

80 **Figure S1** The ECL spectrum of lucigenin on the Tyr/CS/SiC modified electrode in  
81 the absence (black line) and presence (red line) of H<sub>2</sub>O<sub>2</sub> ( $1 \times 10^{-8}$  mol/L). Scan rate:  
82 150mV/s.

83

84

85

86

87

88

89

90

91

92

93

94

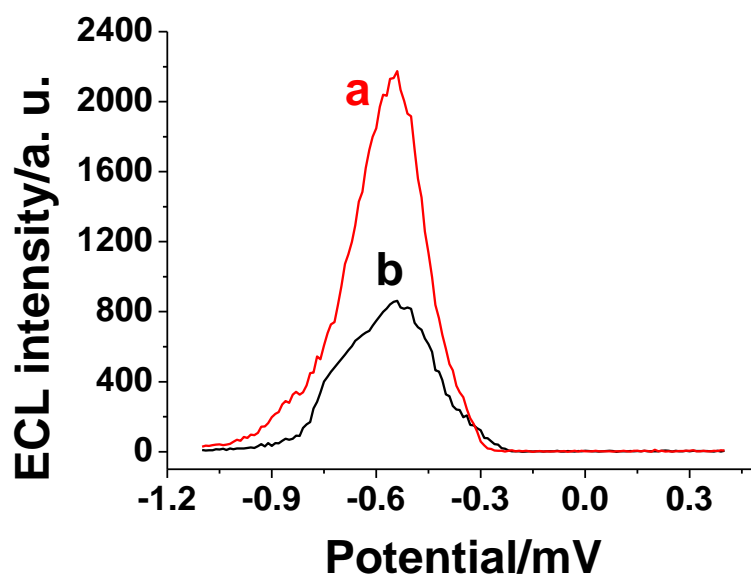

95

96 **Figure S2** The ECL spectrograms of different electrodes. a. Tyr/CS/SiC modified  
97 electrode in the solution containing  $5 \times 10^{-6}$  mol/L adrenaline; b. Control experiment:  
98 CS/SiC modified electrode in the solution containing  $5 \times 10^{-6}$  mol/L adrenaline and 1  
99 mg/mL Tyr

100

101

102

103

104

105

106

107

108

109

110

111

112

113

**Table T1** The specificity of the proposed method

| Interferent                                                        | Relative concentration ratio |
|--------------------------------------------------------------------|------------------------------|
| Na <sup>+</sup> , SO <sub>4</sub> <sup>2-</sup> , NO <sup>3-</sup> | 1000                         |
| Ac <sup>-</sup> , HPO <sub>4</sub> <sup>2-</sup>                   | 500                          |
| EDTA, Citric Acid, Oxalic Acid, Glucose                            | 200                          |
| Noradrenaline, Cl <sup>-</sup>                                     | 100                          |
| Vitamin C, Dopamine, Uric Acid, L- lysine                          | 50                           |
| Fe <sup>3+</sup> , Ca <sup>2+</sup> , Mg <sup>2+</sup>             | 5                            |
| Pb <sup>2+</sup> , Cu <sup>2+</sup> , Zn <sup>2+</sup>             | 2                            |

114

115

116

117

118

119

120

121

122

123

124

125

126

127

128

129

130

131 **Table T2** Adrenaline assay in hydrochloric acid adrenal injection samples by the  
132 proposed method (n = 5).

| Sample number | $C_{adrenaline}(\text{mol/L})$ |                       |                            | Recovery (%) |
|---------------|--------------------------------|-----------------------|----------------------------|--------------|
|               | Diluted (mol/L)                | Added (mol/L)         | Found after adding (mol/L) |              |
| 1             | $4.40 \times 10^{-8}$          | $1.00 \times 10^{-8}$ | $5.11 \times 10^{-8}$      | 94.6         |
| 2             | $4.40 \times 10^{-7}$          | $1.00 \times 10^{-6}$ | $1.24 \times 10^{-6}$      | 85.8         |
| 3             | $4.40 \times 10^{-6}$          | $1.00 \times 10^{-7}$ | $4.78 \times 10^{-6}$      | 106.2        |
| 4             | $1.32 \times 10^{-5}$          | $1.00 \times 10^{-5}$ | $2.03 \times 10^{-5}$      | 87.6         |

133

134

135

136

137

138

139

140

141

142

143

144

145

146

147

148

149

150

151 **Table T3** Adrenaline assay in clinical serum samples by the proposed method (n = 5).

| Sample | Add adrenaline (mol/L) | Detection after Addition (mol/L) | Recovery (%) |
|--------|------------------------|----------------------------------|--------------|
| 1      | $1.00 \times 10^{-8}$  | $1.07 \times 10^{-8}$            | 104.1        |
|        | $2.00 \times 10^{-8}$  | $1.90 \times 10^{-8}$            | 95.4         |
|        | $5.00 \times 10^{-8}$  | $5.10 \times 10^{-8}$            | 106.9        |
| 2      | $1.00 \times 10^{-8}$  | $0.99 \times 10^{-8}$            | 104.0        |
|        | $2.00 \times 10^{-8}$  | $2.23 \times 10^{-8}$            | 113.2        |
|        | $5.00 \times 10^{-8}$  | $5.01 \times 10^{-8}$            | 100.5        |
| 3      | $1.00 \times 10^{-8}$  | $1.12 \times 10^{-8}$            | 115.9        |
|        | $2.00 \times 10^{-8}$  | $1.95 \times 10^{-8}$            | 98.1         |
|        | $5.00 \times 10^{-8}$  | $4.90 \times 10^{-8}$            | 91.0         |

152
